# Supplementary material
Source: Royal Society of Chemistry journal article supplement (doi:10.1039/d5fb00951k)
Supplement: d5fb00951k1.pdf [file d5fb00951k1.pdf]

### Supporting Information

Batch Size: 351 gallons (Standard Mix)

Batch Size: 104 gallons (HFP)

Density: 1.114 kg/L (S)

Density: 1.126 kg/L (HFP)

Table S1. Ingredients breakdown for the standard mix.

| <b>Ingredient (Standard)</b> | <b>BF%</b> | <b>MSNF%</b> | <b>Gallons</b> | <b>Pounds</b> | <b>Kg</b> | <b>kg/kg</b> |
|------------------------------|------------|--------------|----------------|---------------|-----------|--------------|
| Water                        |            |              | 135            | 1,124.55      | 510.01    | 0.344        |
| Cream                        | 30.33      | 6.3          | 153            | 1,286.73      | 583.69    | 0.394        |
| Nonfat Dry Milk              |            | 95           |                | 278           | 126.1     | 0.085        |
| Dry Sucrose                  |            |              |                | 553.35        | 251.01    | 0.170        |
| Stabilizer (Crest 26-2229)   |            |              |                | 12.69         | 5.76      | 0.004        |
| Vanilla                      |            |              |                |               | 0.17%     | 0.0017       |

Table S2. Ingredients breakdown for the standard mix.

| <b>Ingredient (HFP)</b>    | <b>BF%</b> | <b>MSNF%</b> | <b>Gallons</b> | <b>Pounds</b> | <b>Kg</b> | <b>Kg/kg of Ice cream</b> |
|----------------------------|------------|--------------|----------------|---------------|-----------|---------------------------|
| Skim Milk                  |            | 31.74        | 42.569         | 366.092       | 166.021   | 0.375                     |
| Cream                      | 30.97      | 22.782       | 43.218         | 364.223       | 165.237   | 0.373                     |
| Skim Powder                |            | 44.37        |                | 46.218        | 20.968    | 0.047                     |
| Sugar                      |            |              |                | 94            | 42.638    | 0.096                     |
| Soluble Corn Fiber         |            |              |                | 65.8          | 29.854    | 0.067                     |
| Stabilizer (Crest 26-2229) |            |              |                | 3.666         | 1.663     | 0.004                     |
| Vanilla                    |            |              |                |               | 0.17%     | 0.0017                    |

Fig S1. Overall environmental impact of Standard and HFP ice cream production

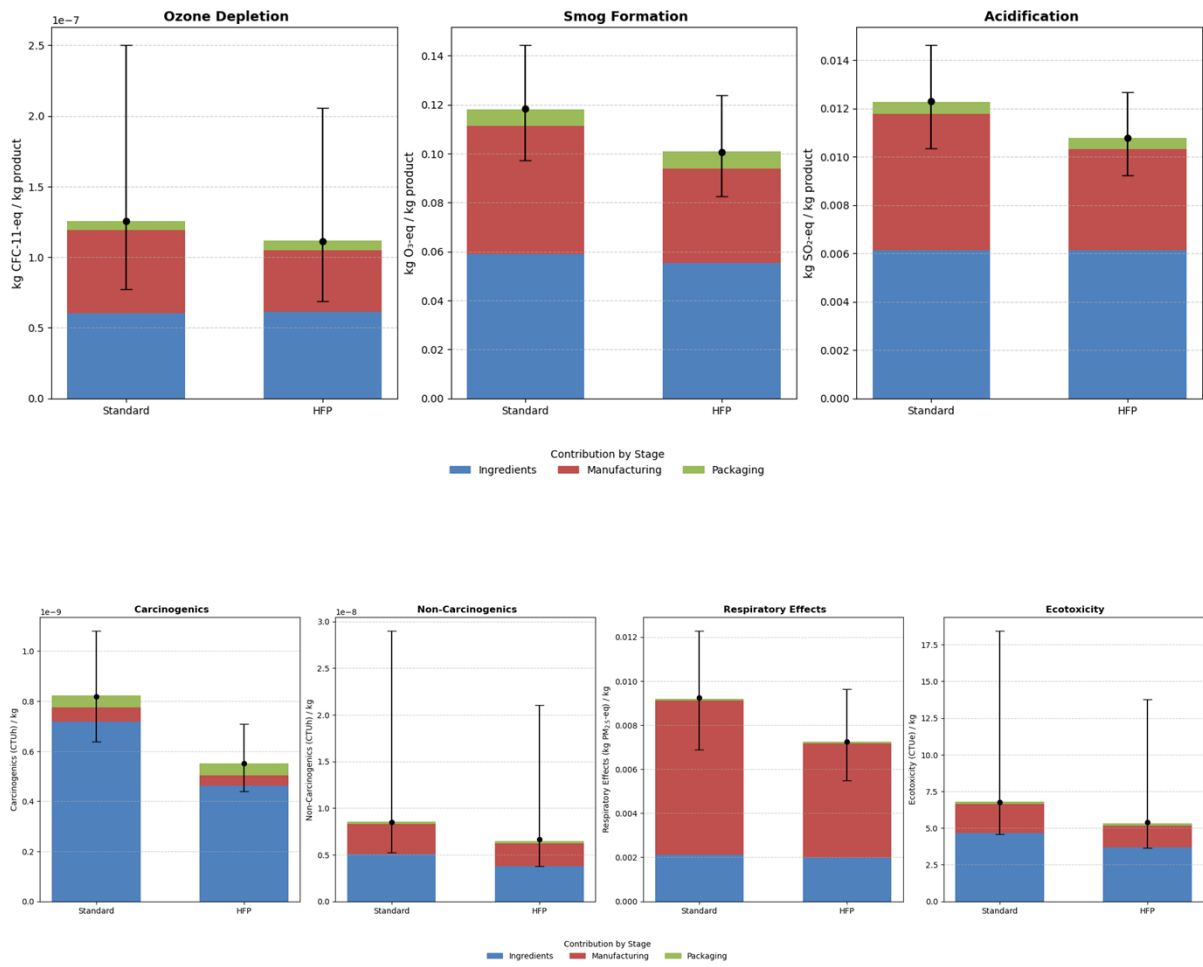

Fig S2. Ingredient-stage contributions to the environmental impacts of standard and HFP ice cream

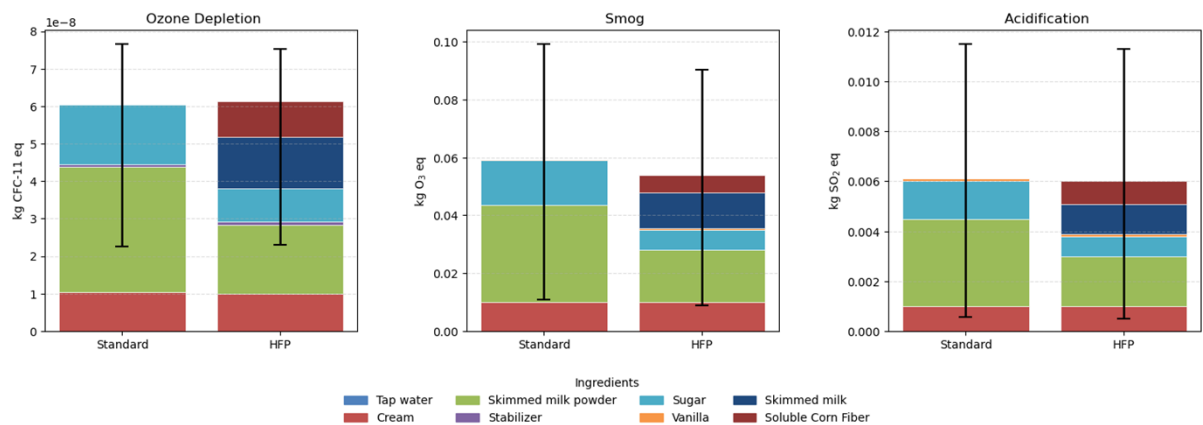

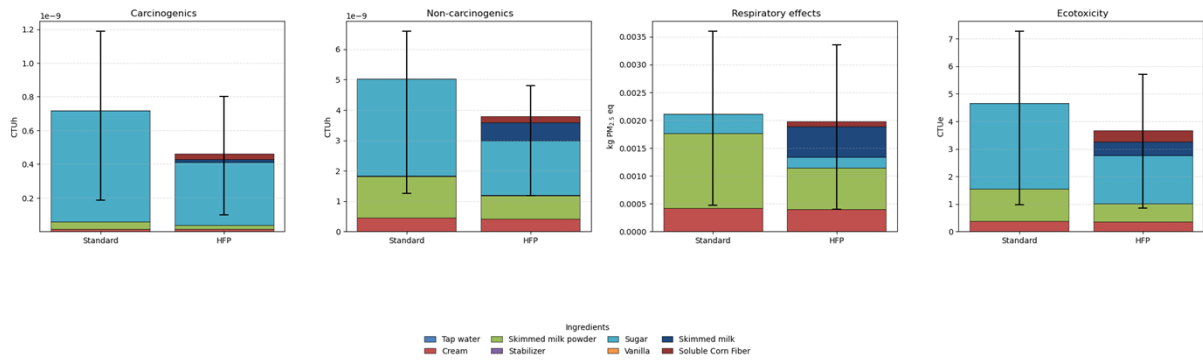

Fig S3. Manufacturing-stage contributions to the environmental impacts of standard and HFP ice cream

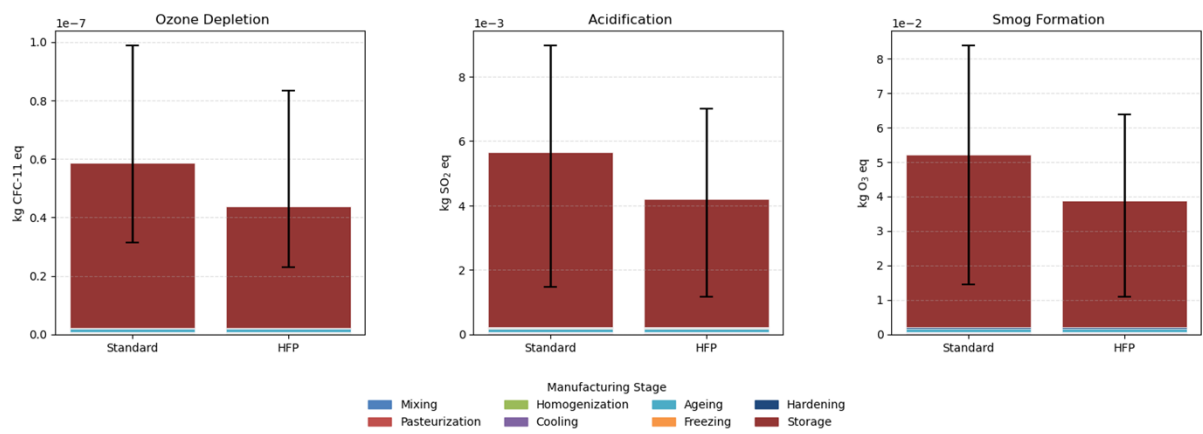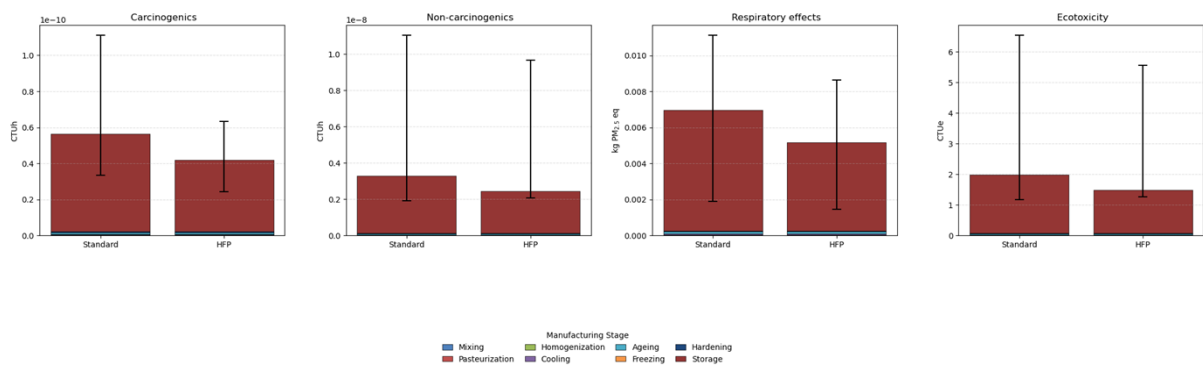

Table S3. Results of uncertainty analysis for Standard mix.

| Impact Category       | mean       | Max        | Min        |
|-----------------------|------------|------------|------------|
| Acidification         | 0.01228213 | 0.00235084 | 0.00193394 |
| Carcinogenics         | 8.1941E-10 | 2.621E-10  | 1.811E-10  |
| Ecotoxicity           | 6.75770216 | 11.6945755 | 2.18768784 |
| Eutrophication        | 0.02677779 | 0.04365367 | 0.01518651 |
| Fossil fuel depletion | 1.93451145 | 0.65407777 | 0.44134089 |
| Global warming        | 2.84095739 | 0.98794149 | 0.76504596 |
| Non carcinogenics     | 8.5109E-09 | 2.0501E-08 | 3.2488E-09 |
| Ozone depletion       | 1.2546E-07 | 1.2493E-07 | 4.8006E-08 |
| Respiratory effects   | 0.00923557 | 0.00304737 | 0.00234628 |
| Smog                  | 0.11843547 | 0.02601675 | 0.02125417 |

Table S4. Results of uncertainty analysis for HFP mix.

| Impact Category       | mean       | Max         | Min        |
|-----------------------|------------|-------------|------------|
| Acidification         | 0.01077867 | 0.001889454 | 0.00153923 |
| Carcinogenics         | 5.5122E-10 | 1.57116E-10 | 1.1141E-10 |
| Ecotoxicity           | 5.37990556 | 8.394774598 | 1.74996544 |
| Eutrophication        | 0.02159741 | 0.031992575 | 0.0112346  |
| Fossil fuel depletion | 1.74459483 | 0.465179696 | 0.33348113 |
| Global warming        | 2.42862959 | 0.720060762 | 0.57261034 |
| Non carcinogenics     | 6.6318E-09 | 1.4374E-08  | 2.831E-09  |
| Ozone depletion       | 1.1137E-07 | 9.42016E-08 | 4.2813E-08 |
| Respiratory effects   | 0.0072371  | 0.002403315 | 0.001762   |
| Smog                  | 0.10064829 | 0.023079463 | 0.01822194 |
